# Supplementary material for: Characterisation of the symbionts in the Mediterranean fruit fly gut
Source: PubMed Central journal article supplement (PMC9453069; doi:10.1099/mgen.0.000801), 2022-04-21
Supplement: mgen-8-0801-s001.pdf [file mgen-8-0801-s001.pdf]

## Characterisation of the symbionts in the Mediterranean fruit fly gut

Darrington, M.<sup>1\*</sup>, Leftwich, P.T.<sup>1\*</sup>, Holmes, N.A.<sup>1,4</sup>, Friend, L.A.<sup>1</sup>, Clarke N.V.E.<sup>1</sup>, Worsley, S.F.<sup>1</sup>, Margaritopolous, J.T.<sup>2</sup>, Hogenhout, S.A.<sup>3</sup>, Hutchings, M.I.<sup>1,4</sup> & Chapman, T<sup>^1</sup>

<sup>1</sup>School of Biological Sciences, University of East Anglia, Norwich Research Park, Norwich, NR4 7TJ, UK.

<sup>2</sup>Department of Plant Protection, Institute of Industrial and Fodder Crops, Hellenic Agricultural Organization–DEMETER, Volos, Greece

<sup>3</sup>Department of Crop Genetics, John Innes Centre, Norwich Research Park, NR4 7UH, Norwich, UK

<sup>4</sup>Department of Molecular Microbiology, John Innes Centre, Norwich Research Park, Norwich, NR4 7UH, UK.

\*Joint first authors

ORCID: PTL 0000-0001-9500-6592

ORCID: TC 0000-0002-2401-8120

ORCID: NAH 0000-0002-4979-9680

ORCID: SFW 0000-0003-4736-0938

ORCID: SAH 0000-0003-1371-5606

ORCID: MH 0000-0001-6628-5940

ORCID: JM 0000-0002-5893-8400

<sup>^</sup>Correspondence: [tracey.chapman@uea.ac.uk](mailto:tracey.chapman@uea.ac.uk)

### Supporting Information

#### 1. Taxonomic analysis of 16S rDNA sequences of medkleb

The EZBioCloud (Yoon et al., 2017) was searched for sequences homologous to Medkleb's putative 16S rDNA sequence from nucleotides 341370-342821 (mk16S). The 16S sequence with greatest homology to mk16S belonged to the W14 strain, which had been classified as *K. michiganensis*. Medkleb's predicted species classification was *K. oxytoca*, hence near identical 16S rRNA homology with *K. michiganensis* was unexpected, although it is recognised that 16S rRNA sequence similarity alone does not confirm species identification (Tindall et al., 2010). As recommended by Tindall et al. (2010), homology between mk16S and 16S rRNA sequences that had been classified as either *K. oxytoca* or *K. michiganensis* was calculated using EZBioCloud (Yoon et al., 2017) but this also failed to distinguish Medkleb as either species. mk16S was compared with 40 16S rRNA sequences classified as either *K. oxytoca* or *K. michiganensis* and was found to be between 98.5 and 99.93% related to all strains

analysed. Stackebrandt (2006) suggest that >98.7% similarity should be the threshold at which 16S rRNA sequences are considered to be conspecific but some authors have suggested thresholds need to be as high as 99.5% (Janda et al., 2007). In conclusion, Medkleb could not be specifically characterised as either *K. oxytoca* or *K. michiganensis* via pairwise analysis of its 16S rRNA sequence, as according to current taxonomic standards (Janda et al., 2007; Stackebrandt, 2006), the *K. oxytoca* and *K. michiganensis* strains analysed here were themselves conspecific.

To classify Medkleb's species with improved resolution, a comprehensive 16S rRNA phylogenetic analysis (Figure S4) was carried out. RefSeq 16S sequences used in the analysis had been classified as either *K. oxytoca*, *K. michiganensis* or *K. pneumoniae* (Quast et al., 2013), and a single strain of *Pseudomonas aeruginosa* was used as an ancestral root for the phylogeny. *K. pneumoniae* sequences were included as a control, as this species is closely related to *K. oxytoca* (Kovtunovych et al., 2003) but distant enough to be distinguished phylogenetically. Medkleb, *K. oxytoca* and *K. michiganensis* sequences formed one homogenous group and *K. pneumoniae* formed an outgroup, suggesting that Medkleb is both *K. oxytoca* and *K. michiganensis* and hence that the species dichotomy is artificial, as suggested above. However, even though 16S rRNA phylogenetic and pairwise analyses failed to delineate *K. oxytoca* from *K. michiganensis*, these species should be considered distinct, as DNA-DNA hybridisation between them is <70% (Saha et al., 2013).

## References

- Janda JM, Abbot SL (2007) 16S rRNA gene sequencing for bacterial identification in the diagnostic laboratory: pluses, perils, and pitfalls. *J. Clinical Microbiol*, 45:761-2764.
- Kovtunovych G, Lytvynenko T, Negrutska V, et al (2003) Identification of *Klebsiella oxytoca* using a specific PCR assay targeting the polygalacturonase *pehX* gene. *Res Microbiol* 154:587–592. doi: 10.1016/S0923-2508(03)00148-7
- Quast, C., Pruesse, E., Yilmaz, P., Gerken, J., Schweer, T., Yarza, P., . . . Glöckner, F. O. (2013). The silva ribosomal RNA gene database project: Improved data processing and web-based tools. *Nucleic Acids Research*, 41. doi:10.1093/nar/gks1219
- Saha R, Farrance CE, Verghese B, et al (2013) *Klebsiella michiganensis* sp. nov., a new bacterium isolated from a tooth brush holder. *Curr Microbiol* 66:72–78. doi: 10.1007/s00284-012-0245-x
- Stackebrandt E (2006) Taxonomic parameters revisited : tarnished gold standards. *Microbiol Today* 33:152–155.
- Tindall, B. J., Rossello-Mora, R., Busse, H. J., Ludwig, W., & Kampfer, P. (2010). Notes on the characterization of prokaryote strains for taxonomic purposes. *Int J Syst Evol Microbiol*, 60(Pt 1), 249-266. doi:10.1099/ijs.0.016949-0
- Yoon SH, Ha SM, Kwon S, Lim J, Kim Y, Se, H. Chun, J, (2017). Introducing EzBioCloud: a taxonomically united database of 16S rRNA gene sequences and whole-genome assemblies. *Int J Sys Evol Microbiol*, 67:1613.

## Supplementary figures

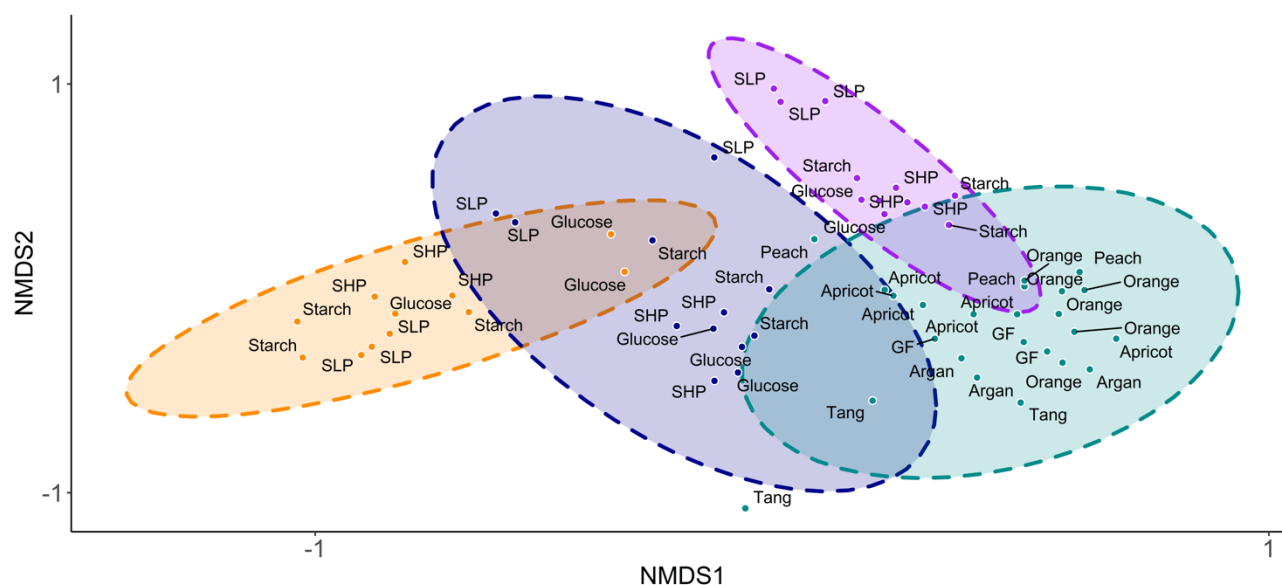

**Figure S1. Medfly microbiome composition.** Measured as community structure/beta diversity visualised as NMDS plots using a Bray-Curtis Dissimilarity Index (stress value = 0.19) with 95% confidence ellipses. The plot gives additional details of the data presented in the main Figure 1A, with the specific diet information added to each data point. Orange ellipse = 3 day old laboratory antibiotic-treated females; mauve = 3 day old laboratory control (non-antibiotic treated) females; blue = 10 day old laboratory control (non-antibiotic treated) females; green = wild -3 day old females.

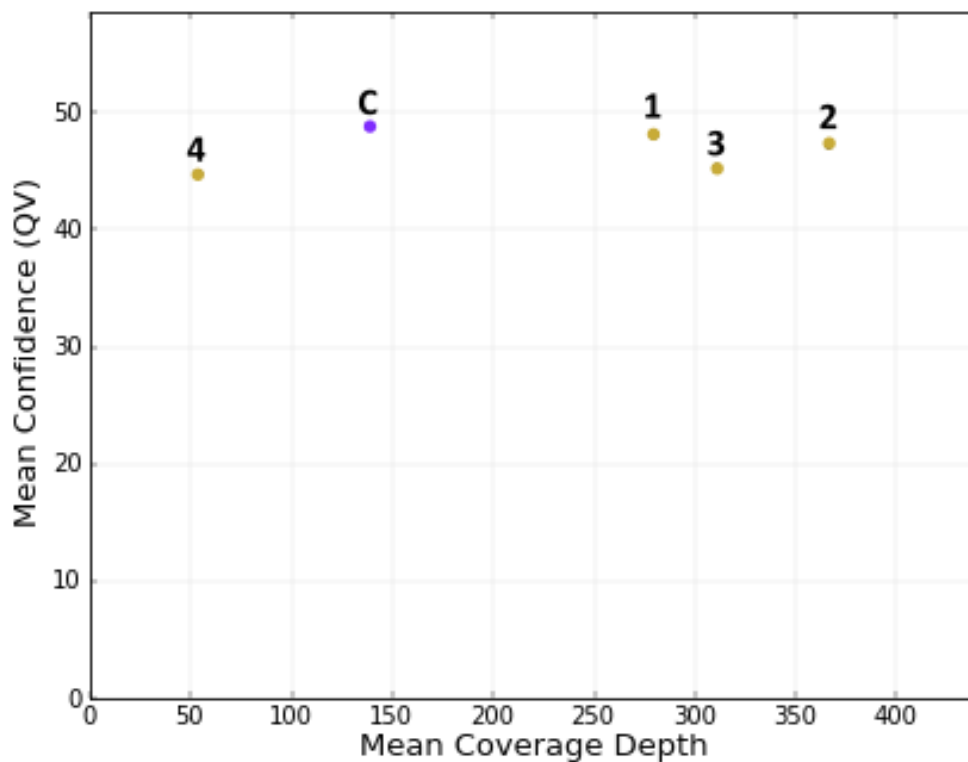

**Figure S2. Contig coverage vs quality value for Medkleb sequencing contigs.** The mean coverage depth for the Medkleb chromosome (purple dot) was 138.7 reads per base, and mean QV was estimated at 48.9. The four plasmids (yellow dots) had mean coverage depths and QV's of: mkp1) 279.6 and 48; mkp2) 366.4 and 47.3; mkp3) 310.8 and 45.3; mkp4) 53.6 and 44.8. Coverage was relatively high in the cases of mkp1-3, which was as predicted, as plasmids are often retained in high copy number.

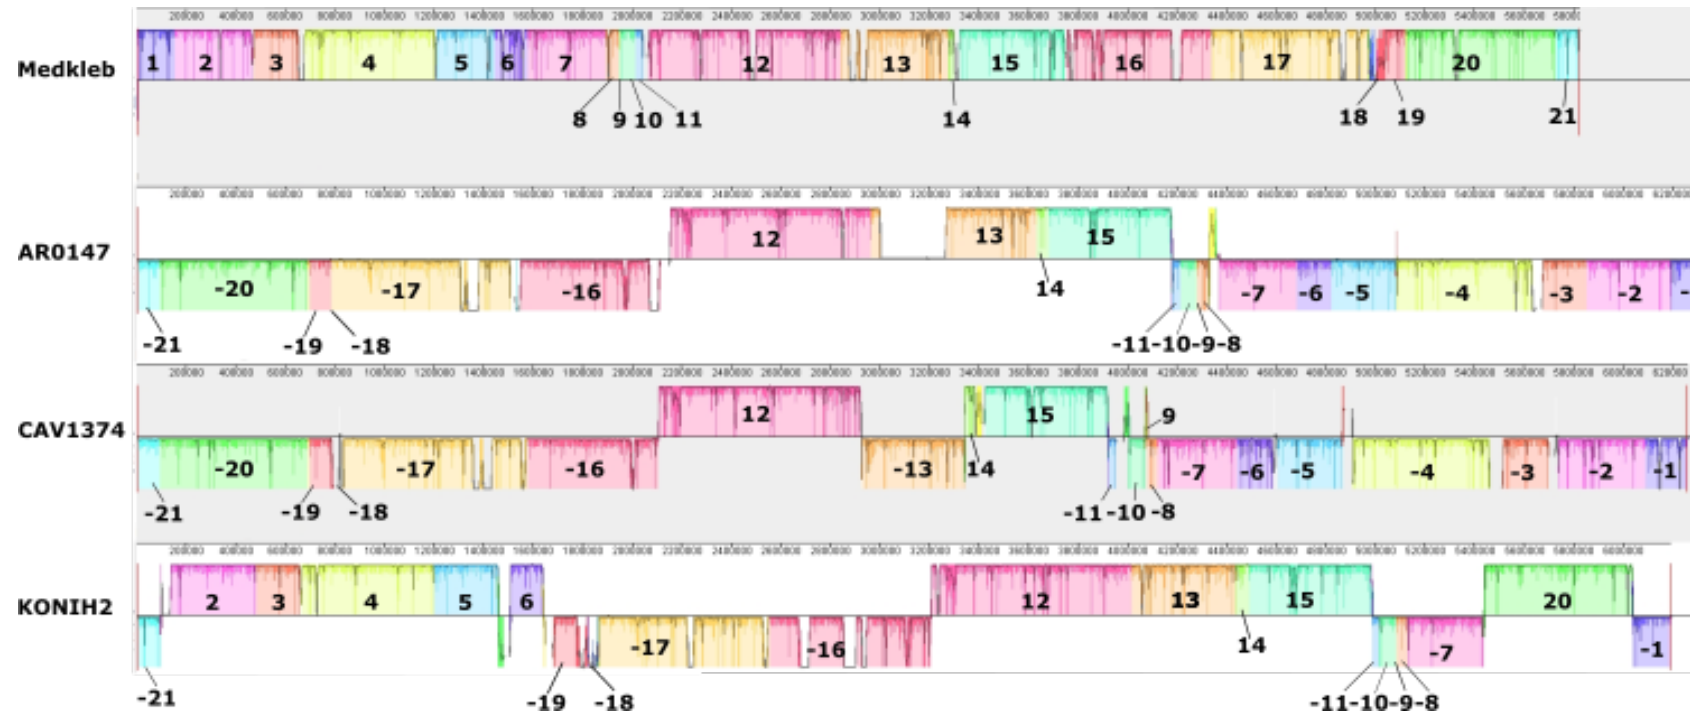

**Figure S3 Synteny plot of Medkleb and three closely related bacteria.** Medkleb was positioned phylogenetically in a clade with three *K. oxytoca* bacteria (strains AR0147, CAV1374 and KONIH2) with ANI analysis (Konstantinidis et al., 2005). progressiveMauve (Darling et al., 2010) was then used to assess synteny between Medkleb, AR0147, CAV1374 and KONIH2. This analysis, which is represented graphically above, uncovered 21 conserved local colinear blocks (LCBs) (Darling et al., 2010) of nucleotide sequence that were shared between all genomes analysed. Block height corresponds the degree of regional sequence conservation. When compared to Medkleb, sequence conservation in block 18 was low for strains AR0147, CAV1374 and KONIH2. There were several instances of LCB inversion between strains but inverted LCBs were not low in height, which indicated that nucleotide sequence was conserved.

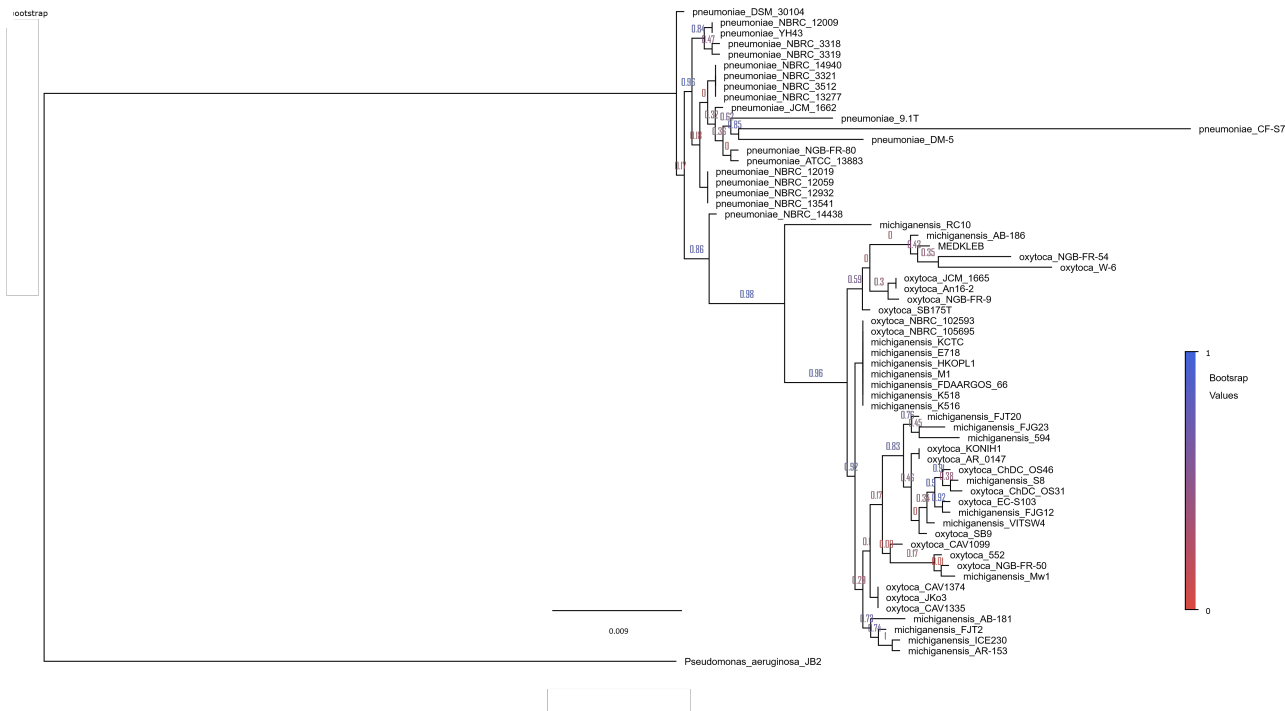

**Figure S4. Phylogeny showing the evolutionary relationship of 16S rRNA genes belonging to Medkleb and three species of the *Klebsiella* genus.** The phylogeny was created with the Silva ACT service (Pruesse et al., 2012), the FastTree2 maximum likelihood program (Price et al., 2010) and rooted with *Pseudomonas aeruginosa* strain JB2. The scale bar represents substitutions per site. Bootstrap values are represented at all nodes and are colour coded according to confidence level (blue = 1 and red = 0). 16S rRNA sequences of strains that had been identified as *K. pneumoniae* demonstrated clear evolutionary divergence and segregated definitively from *K. oxytoca* and *K. michiganensis* strains. 16S rRNA sequences identified as *K. oxytoca* and *K. michiganensis* formed one homogenous group, with some species level clustering but no reliable pattern of distribution. Species identification of Medkleb was not possible based on this phylogeny, as it segregated within the *K. oxytoca*, *K. michiganensis* group.



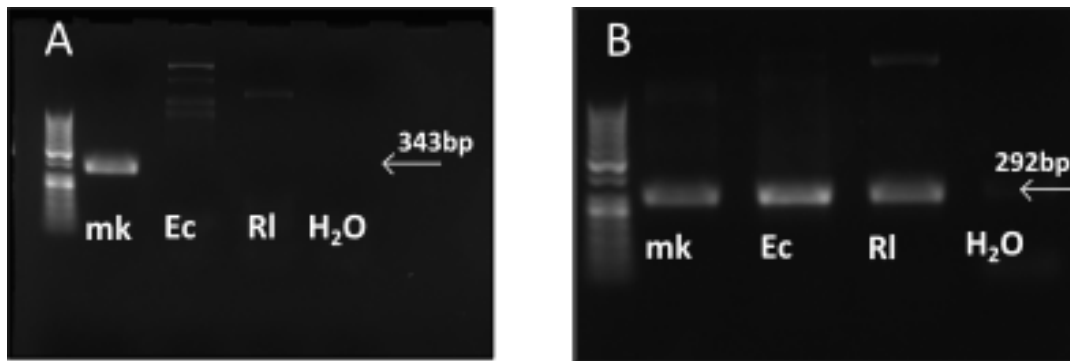

**Figure S6. PCR amplifications of *pehX* and 16S rRNA genes.** Both gels were run with three samples of DNA and a water control. A) PCR amplification of the *pehX* gene produced the expected 343bp product from Medkleb (*mk*). Neither *Erwinia carotovora* (*Ec*) nor *Rhizobium leguminosarum* (*Rl*) amplified this product, but both (*Ec* in particular) appeared to amplify products larger than 343bp. B) Control reactions: all three species of bacteria produced the expected 292bp 541F-806R amplicon following PCR amplification of 16S rRNA, which verified the quality of DNA and reagents used in the PCR assays. The assay was run mainly to help to identify Medkleb to species level, as the *pehX* primers deployed here have previously been used for that purpose (Kovtunovych et al 2003; Saha et al. 2013). Alternative primers could be designed for the *Erwinia pehX* gene. However, the purpose of the assay was as a diagnostic for Medkleb, not to explore any potential orthologues or alternative *pehX* gene possessed by *Erwinia* that might degrade pectin. For details of methods and primers, see main MS.



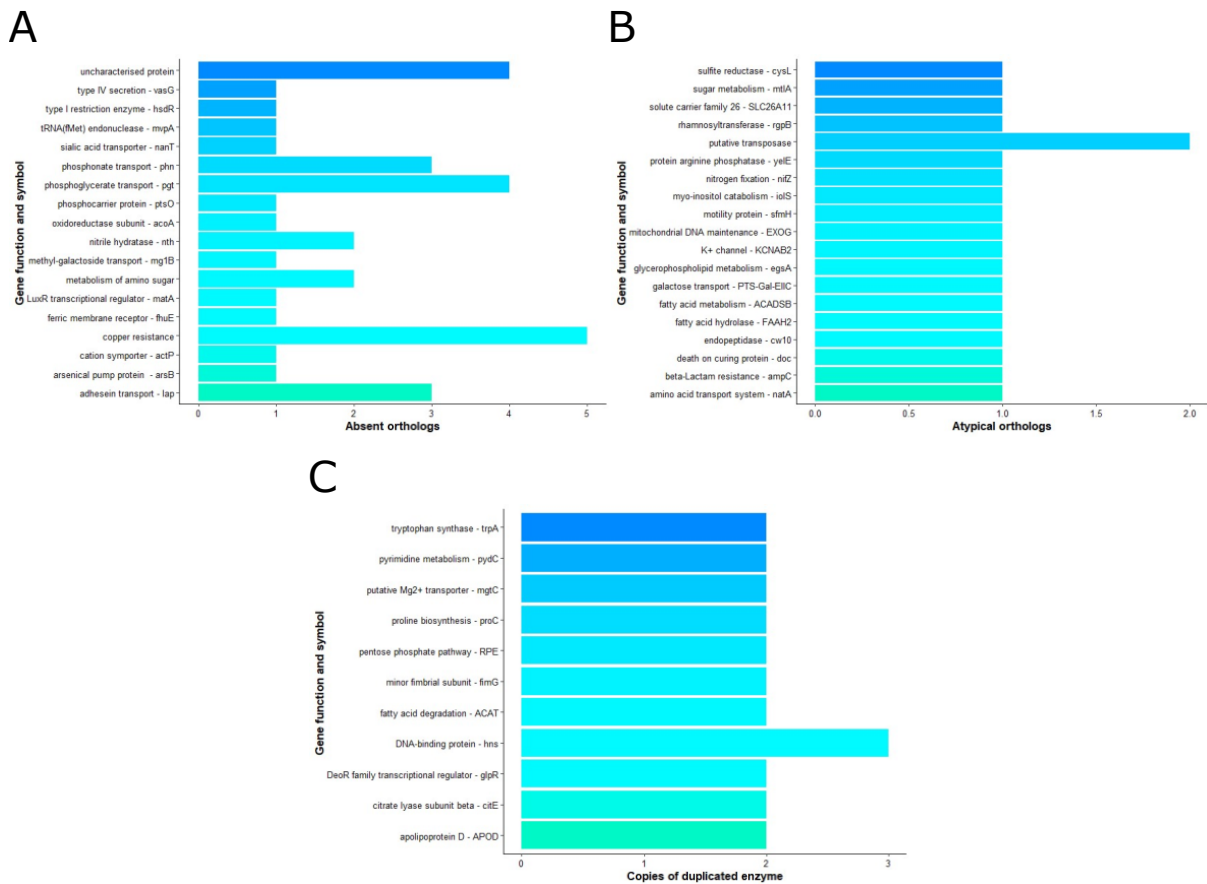

**Figure S7. KEGG analyses of Medkleb's gene functions in comparison to six *K. michiganensis* specimens in the Medkleb group.** The functions of genes and gene symbols are represented on the y-axes. Each function is denoted by a discrete colour. The number of genes providing each function are represented on the x-axes. **A)** Gene functions that were absent in the Medkleb genome but present in all other genomes analysed. Medkleb did not code for 35 genes that were present in every other genome analysed and these were associated with 17 discrete functions. Loss of function occurred in clusters of genes relating to the detoxification of xenobiotic compounds. **B)** Gene functions that were present in the Medkleb genome but absent from all other genomes analysed. Medkleb codes for 21 atypical genes with 20 different functions. Broadly, these genes were predicted to be involved in metabolism, transport and gene transposition. **C)** Gene functions that were duplicated in the Medkleb genome but not in any other genome analysed. Medkleb has duplicated 11 genes that are either absent or held in single copy by all other genomes analysed. Duplicated functions include the biosynthesis of amino acids and degradation of citrate.

## Supplementary tables

**Table S1. Larval diets.** These larval diets were used for laboratory rearing of wild type Toliman flies for 16S rRNA investigation of adult female microbiomes.

| Diet                              | Ingredient     | Quantity |
|-----------------------------------|----------------|----------|
| <b>Sucrose High protein (SHP)</b> | Water          | 1000 ml  |
|                                   | Agar           | 15 g     |
|                                   | Sucrose        | 30 g     |
|                                   | Yeast          | 50 g     |
|                                   | Propionic Acid | 5 ml     |
| <b>Sucrose Low Protein (SLP)</b>  | Water          | 1000 ml  |
|                                   | Agar           | 15 g     |
|                                   | Sucrose        | 30 g     |
|                                   | Yeast          | 30 g     |
|                                   | Propionic Acid | 5 g      |
| <b>Starch</b>                     | Water          | 1000 ml  |
|                                   | Agar           | 15 g     |
|                                   | Starch         | 30 g     |
|                                   | Yeast          | 50 g     |
|                                   | Propionic Acid | 5 g      |
| <b>Glucose</b>                    | Water          | 1000 ml  |
|                                   | Agar           | 15 g     |
|                                   | Glucose        | 30 g     |
|                                   | Yeast          | 50 g     |
|                                   | Propionic Acid | 5 g      |

**Table S2. Contig derivation and GC content.** mIplasmids (Arredondo-Alonso et al., 2018) predicted that the largest of the five Medkleb contigs was chromosomal, with a posterior probability ( $p(\theta|X)$ ) of 0.991. mkp2 and mkp5 were predicted to be plasmid-derived, with posterior probabilities of 0.962 and 0.977 respectively. The posterior probabilities of mkp3 and mkp4 being plasmid-derived were less powerful but still robust, at 0.864 and 0.882 respectively. mkp2 and mkp4 both had GC content comparable to that of the putative chromosomal contig, suggesting they had arisen as a result of a recent horizontal transfer.

| contig | length  | $p(\theta X)$ | Prediction     | GC(%) |
|--------|---------|---------------|----------------|-------|
| 1      | 5825435 | 0.009         | Chromosome     | 56.03 |
| 2      | 136402  | 0.962         | Plasmid (mkp1) | 55.18 |
| 3      | 122124  | 0.864         | Plasmid (mkp2) | 50.4  |
| 4      | 78046   | 0.882         | Plasmid (mkp3) | 56.68 |
| 5      | 63257   | 0.977         | Plasmid (mkp4) | 50.65 |

**Table S3. Synopsis of the Medkleb genome.** The Medkleb genome was 5867451 nt in length and coded for a total of 5388 genes, at a coding density of 0.941 genes per kb.

|                             |         |
|-----------------------------|---------|
| Length (nt)                 | 5825435 |
| GC content (%)              | 56.03   |
| CDS (+ve strand)            | 2541    |
| CDS (-ve strand)            | 2847    |
| Overall coding sequence (%) | 87.8    |
| Gene density (per kb)       | 0.941   |

**Table S4. Comparison of plasmid genomes.** mkps 1-4 varied in length by over 100%, and GC content varied by 6.3%. Plasmid 4 was relatively small but had the greatest gene density, utilising approximately 4% more nucleotide sequence for protein coding than other plasmids.

|                                    | mkp1   | mkp2   | mkp3  | mkp4  |
|------------------------------------|--------|--------|-------|-------|
| <b>Length (nt)</b>                 | 136402 | 122124 | 78046 | 63257 |
| <b>GC content (%)</b>              | 55.2   | 50.4   | 56.7  | 50.7  |
| <b>CDS (+ve strand)</b>            | 105    | 95     | 75    | 62    |
| <b>CDS (-ve strand)</b>            | 70     | 64     | 8     | 42    |
| <b>Overall coding sequence (%)</b> | 80.3   | 81.1   | 81.2  | 85.3  |
| <b>Gene density (per kb)</b>       | 1.28   | 1.31   | 1.06  | 1.64  |
| <b>Annotated plasmid CDS (n)</b>   | 12     | 3      | 18    | 12    |
| <b>Mobile element protein CDS</b>  | 21     | 21     | 1     | 5     |

**Table S5. Comparison of gene functionality for *K. oxytoca* bacteria in the Medkleb group.** The total number of gene functions was fairly consistent in this group, at approximately 2900 per strain. In terms of atypical functions, Medkleb had a relatively large complement, but fewer than CAV1752. The Medkleb genome had more absent gene functions than was found for conspecifics.

|                | <b>Total gene functions</b> | <b>Atypical functions</b> | <b>Absent functions</b> |
|----------------|-----------------------------|---------------------------|-------------------------|
| <b>Medkleb</b> | 2857                        | 21                        | 35                      |
| <b>AR0147</b>  | 2904                        | 12                        | 4                       |
| <b>CAV1752</b> | 2882                        | 24                        | 5                       |
| <b>CAV1374</b> | 2944                        | 11                        | 6                       |
| <b>KONIH1</b>  | 2917                        | 18                        | 3                       |
| <b>KONIH2</b>  | 2912                        | 13                        | 10                      |
| <b>KONIH5</b>  | 2882                        | 11                        | 5                       |

**Table S6. Accession numbers for genomes and nucleotide sequences used for 16S and ANI analyses.**

| <b>Strain</b> | <b>Classification on NCBI</b> | <b>Accession or nucleotides</b> | <b>Analysis</b> |
|---------------|-------------------------------|---------------------------------|-----------------|
| WCHKP8F4      | pneumoniae                    | CP027068.2                      | ANI             |
| WCHKP649      | pneumoniae                    | CP026585.2                      | ANI             |
| ATCC BAA-2146 | pneumoniae                    | CP006659.2                      | ANI             |
| WCHKP34       | pneumoniae                    | CP025963.1                      | ANI             |
| GN-2          | pneumoniae                    | CP019160.1                      | ANI             |
| NR5632        | pneumoniae                    | CP025143.1                      | ANI             |
| KP1768        | pneumoniae                    | CP025140.1                      | ANI             |
| KP1766        | pneumoniae                    | CP025146.1                      | ANI             |
| Kp52.145      | pneumoniae                    | FO834906.1                      | ANI             |
| SGH10         | pneumoniae                    | CP025080.1                      | ANI             |
| YH43          | pneumoniae                    | NZ_AP014950.1                   | ANI             |
| LMG 23571     | variicola                     | CP013985.1                      | ANI             |
| DSM 15968     | variicola                     | CP010523.2                      | ANI             |
| GJ3           | variicola                     | CP017289.1                      | ANI             |
| GJ2           | variicola                     | CP017849.1                      | ANI             |
| GJ1           | variicola                     | CP017284.1                      | ANI             |
| DX120E        | variicola                     | CP009274.2                      | ANI             |
| At-22         | variicola                     | NC_013850.1                     | ANI             |
| HKUOPLA       | variicola                     | CP012252.1                      | ANI             |
| KONIH5        | oxytoca                       | CP026275.1                      | ANI             |
| KONIH1        | oxytoca                       | CP008788.1                      | ANI             |
| HKOPL1        | michiganensis                 | CP004887.1                      | ANI             |
| FDAARGOS_66   | michiganensis                 | JTBQ02000003.1                  | ANI             |
| CAV1752       | oxytoca                       | CP018362.1                      | ANI             |
| M1            | michiganensis                 | CP008841.1                      | ANI             |
| K518          | michiganensis                 | CP023185.1                      | ANI             |
| E718          | michiganensis                 | NC_018106.1                     | ANI             |
| K516          | michiganensis                 | CP022348.1                      | ANI             |
| KONIH2        | oxytoca                       | CP026285.1                      | ANI             |
| CAV1374       | oxytoca                       | CP011636.1                      | ANI             |
| AR_0147       | oxytoca                       | CP020358.1                      | ANI             |
| JKo3          | oxytoca                       | AP014951.1                      | ANI             |
| FDAARGOS_335  | oxytoca                       | CP027426.1                      | ANI             |
| CAV1015       | oxytoca                       | CP017928.1                      | ANI             |
| CAV1374       | oxytoca                       | NZ_CP011636.1                   | 16S             |
| jkO3          | oxytoca                       | AP014951.1                      | 16S             |
| KONIH1        | oxytoca                       | 705389-706840                   | 16S             |
| AR0147        | oxytoca                       | 3961749-3963200                 | 16S             |
| JCM_1665      | oxytoca                       | NR_113341.1                     | 16S             |
| NRBC_102593   | oxytoca                       | NR_114152.1                     | 16S             |
| ECS103        | oxytoca                       | AB200255.1                      | 16S             |
| An16-2        | oxytoca                       | AB244452.1                      | 16S             |
| NBRC_105695   | oxytoca                       | AB682268.1                      | 16S             |
| NGB-FR-9      | oxytoca                       | AB749211.1                      | 16S             |

|             |               |                 |     |
|-------------|---------------|-----------------|-----|
| NGB-FR-50   | oxytoca       | AB749216.1      | 16S |
| NGB-FR-54   | oxytoca       | AB749218.1      | 16S |
| W-6         | oxytoca       | AF390083.1      | 16S |
| ChDC_OS31   | oxytoca       | AF543283.1      | 16S |
| ChDC_OS46   | oxytoca       | AF543296.1      | 16S |
| SB9         | oxytoca       | AJ871855.1      | 16S |
| SB175T      | oxytoca       | AJ871858.1      | 16S |
| 552         | oxytoca       | AY292867.1      | 16S |
| CAV1099     | oxytoca       | 3582325-3583776 | 16S |
| CAV1335     | oxytoca       | 3603336-3604787 | 16S |
| NGB-FR-80   | pneumoniae    | AB749220.1      | 16S |
| CF-S7       | pneumoniae    | AB933264.1      | 16S |
| DM-5        | pneumoniae    | AF390084.1      | 16S |
| DSM_30104   | pneumoniae    | AJ233420.1      | 16S |
| 9.1T        | pneumoniae    | AY918488.1      | 16S |
| ATCC_13883  | pneumoniae    | NR_119278.1     | 16S |
| NBRC_14940  | pneumoniae    | NR_113702.1     | 16S |
| JCM_1662    | pneumoniae    | NR_113240.1     | 16S |
| NBRC_3318   | pneumoniae    | AB680060.1      | 16S |
| NBRC_3319   | pneumoniae    | AB680061.1      | 16S |
| NBRC_3321   | pneumoniae    | AB680063.1      | 16S |
| NBRC_3512   | pneumoniae    | AB680095.1      | 16S |
| NBRC_12009  | pneumoniae    | AB680212.1      | 16S |
| NBRC_14438  | pneumoniae    | AB680615        | 16S |
| NBRC_12019  | pneumoniae    | AB680217.1      | 16S |
| NBRC_12059  | pneumoniae    | AB680226.1      | 16S |
| NBRC_12932  | pneumoniae    | AB680340.1      | 16S |
| NBRC_13277  | pneumoniae    | AB680392.1      | 16S |
| NBRC_13541  | pneumoniae    | AB680431.1      | 16S |
| YH43        | pneumoniae    | 5358317-5356853 | 16S |
| KCTC 1686   | michiganensis | 1556602-1558066 | 16S |
| E718        | michiganensis | 130024-131488   | 16S |
| HKOPL1      | michiganensis | 5479796-5481260 | 16S |
| M1          | michiganensis | 565404-566868   | 16S |
| RC10        | michiganensis | 4647101-4648565 | 16S |
| FDAARGOS_66 | michiganensis | 2604570-2606034 | 16S |
| K518        | michiganensis | 3135117-3136581 | 16S |
| K516        | michiganensis | 3014193-3015657 | 16S |
| VITSW4      | michiganensis | KP100328.1      | 16S |
| S8          | michiganensis | KX346260.1      | 16S |
| Mw1         | michiganensis | LC191534.1      | 16S |
| ICE230      | michiganensis | KX588579.1      | 16S |
| AB-186      | michiganensis | KF817789.1      | 16S |
| AR-153      | michiganensis | KF817762.1      | 16S |
| FJT2        | michiganensis | MG571664.1      | 16S |
| AB-181      | michiganensis | KF817784.1      | 16S |
| FJT20       | michiganensis | MG571682.1      | 16S |
| FJG12       | michiganensis | MG516124.1      | 16S |

FJG23  
594

michiganensis  
michiganensis

MG516135.1  
KY407753.1

16S  
16S

---
